# Supplementary material for: Impact of Nitrogen Fertilizer Levels on Metabolite Profiling of the Lycium barbarum L. Fruit
Source: MDPI journal article supplement (doi:10.3390/molecules24213879), 2019-10-28
Supplement: s1 [file s1]

## Plant flavone

**FOR RESEARCH USE ONLY**

### Drug Names

Generic Name : **Plant flavone (flavone) ELISA Kit.**

### Purpose

This kit allows for the determination of flavone concentrations in Plant tissue homogenates and other biological fluids.

### Principle of the assay

The kit assay Plant flavone level in the sample, use Purified Plant flavone antibody to coat microtiter plate wells, make solid-phase antibody, then add flavone to the wells, Combined antibody which With HRP labeled, become antibody-antigen-enzyme-antibody complex, after washing Completely, Add TMB substrate solution, TMB substrate becomes blue color At HRP enzyme-catalyzed, reaction is terminated by the addition of a sulphuric acid solution and the color change is measured spectrophotometrically at a wavelength of 450 nm. The concentration of flavone in the samples is then determined by comparing the O.D. of the samples to the standard curve.

### Materials provided with the kit

| Materials provided with the kit | 48determination<br>s | 96 determinations | Storage |
|---------------------------------|----------------------|-------------------|---------|
| User manual                     | 1                    | 1                 |         |
| Closure plate membrane          | 2                    | 2                 |         |
| Sealed bags                     | 1                    | 1                 |         |
| Microelisa stripplate           | 1                    | 1                 | 2-8℃    |
| Standard                        | 0.3ml×6 bottle       | 0.3ml×6 bottle    | 2-8℃    |
| HRP-Conjugate reagent           | 5ml×1 bottle         | 10ml×1 bottle     | 2-8℃    |
| Sample diluent                  | 3ml×1 bottle         | 6ml×1 bottle      | 2-8℃    |
| Chromogen Solution A            | 3ml×1 bottle         | 6ml×1 bottle      | 2-8℃    |
| Chromogen Solution B            | 3ml×1 bottle         | 6ml×1 bottle      | 2-8℃    |
| Stop Solution                   | 3ml×1 bottle         | 6ml×1 bottle      | 2-8℃    |
| 20× Wash solution               | 15ml×1 bottle        | 25ml×1 bottle     | 2-8℃    |

**Note:** Standard concentration was followed by:

4000、2000、1000、500、250、0 μg/mL.

### Specimen requirements

1. **serum**- coagulation at room temperature 10-20 mins , centrifugation 20-min at the speed of 2000-3000 r.p.m. remove supernatant, If precipitation appeared, Centrifugal again.
2. **plasma**-use suited EDTA or citrate plasma as an anticoagulant,mix 10-20 mins ,centrifugation 20-min at the speed of 2000-3000 r.p.m. remove supernatant, If precipitation appeared, Centrifugal again.
3. **Urine**-collect sue a sterile container, centrifugation 20-min at the speed of 2000-3000 r.p.m. remove supernatant, If precipitation appeared, Centrifugal again. The Operation of Hydrothorax and cerebrospinal fluid Reference to it.
4. **cell culture supernatant**-detect secretory components, collect sue a sterile container, centrifugation 20-min at the speed of 2000-3000 r.p.m. remove supernatant,detect the composition of cells, Dilut cell suspension

订购热线: 021-54461587 QQ: 2885196588

监督电话: 13818158258

- with PBS (PH7.2-7.4) , Cell concentration reached 1 million / ml, repeated freeze-thaw cycles, damage cells and release of intracellular components, centrifugation 20-min at the speed of 2000-3000 r.p.m. remove supernatant, If precipitation appeared, Centrifugal again.
5. **Tissue samples-** After cutting samples, check the weight,add PBS ( PH7.2-7.4 ) , Rapidly frozen with liquid nitrogen, maintain samples at 2-8℃ after melting,add PBS (PH7.4) , Homogenized by hand or Grinders, centrifugation 20-min at the speed of 2000-3000 r.p.m. remove supernatant.
  6. extract as soon as possible after Specimen collection,and according to the relevant literature, and should be experiment as soon as possible after the extraction. If it can't, specimen can be kept in -20 ℃ to preserve, Avoid repeated freeze-thaw cycles.
  7. Can't detect the sample which contain NaN<sub>3</sub>, because NaN<sub>3</sub> inhibits HRP active.

### Assay procedure

1. Add standard: Set Standard wells, testing sample wells. Add standard 50μl to standard well.
- 2.add sample: Set blank wells separately (blank comparison wells don't add sample and HRP-Conjugate reagent, other each step operation is same). testing sample well. add Sample dilution 40μl to testing sample well, then add testing sample 10μl (sample final dilution is 5-fold), add sample to wells , don't touch the well wall as far as possible, and Gently mix.
- 3.add enzyme: Add HRP-Conjugate reagent 100μl to each well, except blank well.
- 4.Incubate: After closing plate with Closure plate membrane ,incubate for 60 min at 37℃.
- 5.Configure liquid: 20-fold wash solution diluted 20-fold with distilled water

and reserve.

6.washing : Uncover Closure plate membrane, discard Liquid, dry by swing, add washing buffer to every well, still for 30s then drain, repeat 5 times, dry by pat.

7.color : Add Chromogen Solution A 50ul and Chromogen Solution B to each well, evade the light preservation for 15 min at 37℃

8.Stop the reaction : Add Stop Solution 50μl to each well, Stop the reaction(the blue color change to yellow color).

9.assay : take blank well as zero , Read absorbance at 450nm after Adding Stop Solution and within 15min.



### Important notes

1. The kit takes out from the refrigeration environment should be balanced 15-30 minutes in the room temperature, ELISA plates coated if has not use up after opened, the plate should be stored in Sealed bag.
2. washing buffer will Crystallization separation, it can be heated the water helps dissolve when dilute . Washing does not affect the result.
3. add Sample with sampler Each step, And proofread its accuracy frequently, avoids the experimental error. add sample within 5 mins, if the number of sample is much , recommend to use Volley .
4. if the testing material content is excessively higher (The sample OD is bigger than the first standard well ),please dilute Sample (n-fold), Please diluente and multiplied by the dilution factor. ( $\times n \times 5$ ) .
5. Closure plate membrane only limits the disposable use, to avoid cross-contamination.
6. The substrate evade the light preservation.
7. Please according to use instruction strictly, The test result determination must take the microtiter plate reader as a standard.
8. All samples, washing buffer and each kind of reject should according to infective material process.
9. Do not mix reagents with those from other lots.

### Calculate

Take the standard density as the horizontal, the OD value for the vertical, draw the standard curve on graph paper. Find out the corresponding density according to the sample OD value by the Sample curve, multiplied by the dilution multiple, or calculate the straight line regression equation of the standard curve with the standard density and the OD value, with the sample OD value in the equation, calculate the sample density,

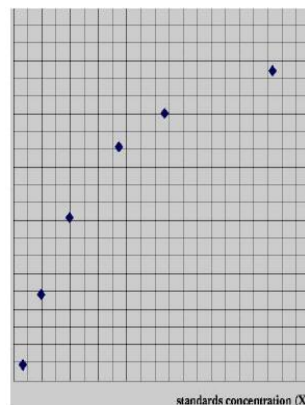

This chart is for reference only

### Assay range

125  $\mu\text{g/mL}$  - 4000  $\mu\text{g/mL}$

### Sensitivity

The minimum detectable dose is typically less than 10  $\mu\text{g/mL}$

### Storage and validity

1. Storage : 2-8°C.
2. validity : six months.

## Plant polysaccharide

**FOR RESEARCH USE ONLY**

### Drug Names

Generic Name : **Plant polysaccharide (Pol) ELISA Kit.**

### Purpose

This kit allows for the determination of Pol concentrations in Plant tissue homogenates and other biological fluids.

### Principle of the assay

The kit assay Plant Pol level in the sample, use Purified Plant Pol antibody to coat microtiter plate wells, make solid-phase antibody, then add Pol to the wells, Combined antibody which With HRP labeled, become antibody-antigen-enzyme-antibody complex, after washing Completely, Add TMB substrate solution,TMB substrate becomes blue color At HRP enzyme-catalyzed, reaction is terminated by the addition of a sulphuric acid solution and the color change is measured spectrophotometrically at a wavelength of 450 nm. The concentration of Pol in the samples is then determined by comparing the O.D. of the samples to the standard curve.

## Materials provided with the kit

| Materials provided with the kit | 48determinations | 96 determinations | Storage |
|---------------------------------|------------------|-------------------|---------|
| User manual                     | 1                | 1                 |         |
| Closure plate membrane          | 2                | 2                 |         |
| Sealed bags                     | 1                | 1                 |         |
| Microelisa stripplate           | 1                | 1                 | 2-8℃    |
| Standard                        | 0.3ml×6 bottle   | 0.3ml×6 bottle    | 2-8℃    |
| HRP-Conjugate reagent           | 5ml×1 bottle     | 10ml×1 bottle     | 2-8℃    |
| Sample diluent                  | 3ml×1 bottle     | 6ml×1 bottle      | 2-8℃    |
| Chromogen Solution A            | 3ml×1 bottle     | 6ml×1 bottle      | 2-8℃    |
| Chromogen Solution B            | 3ml×1 bottle     | 6ml×1 bottle      | 2-8℃    |
| Stop Solution                   | 3ml×1 bottle     | 6ml×1 bottle      | 2-8℃    |
| 20× Wash solution               | 15ml×1 bottle    | 25ml×1 bottle     | 2-8℃    |

**Note:** Standard concentration was followed by:

8、4、2、1、0.5、0 ng/L.

## Specimen requirements

- serum**- coagulation at room temperature 10-20 mins, centrifugation 20-min at the speed of 2000-3000 r.p.m. remove supernatant, If precipitation appeared, Centrifugal again.
- plasma**-use suited EDTA or citrate plasma as an anticoagulant,mix 10-20 mins ,centrifugation 20-min at the speed of 2000-3000 r.p.m. remove supernatant, If precipitation appeared, Centrifugal again.
- Urine**-collect sue a sterile container, centrifugation 20-min at the speed of 2000-3000 r.p.m. remove supernatant, If precipitation appeared, Centrifugal again. The Operation of Hydrothorax and cerebrospinal fluid Reference to it.
- cell culture supernatant**-detect secretory components, collect sue a sterile container, centrifugation 20-min at the speed of 2000-3000 r.p.m. remove supernatant,detect the composition of cells, Dilut cell suspension

订购热线: 021-54461587 QQ: 2885196588

监督电话: 13818158258



- with PBS (PH7.2-7.4) , Cell concentration reached 1 million / ml, repeated freeze-thaw cycles, damage cells and release of intracellular components, centrifugation 20-min at the speed of 2000-3000 r.p.m. remove supernatant, If precipitation appeared, Centrifugal again.
5. **Tissue samples-** After cutting samples, check the weight,add PBS ( PH7.2-7.4 ) , Rapidly frozen with liquid nitrogen, maintain samples at 2-8℃ after melting,add PBS ( PH7.4 ) , Homogenized by hand or Grinders, centrifugation 20-min at the speed of 2000-3000 r.p.m. remove supernatant.
6. extract as soon as possible after Specimen collection,and according to the relevant literature, and should be experiment as soon as possible after the extraction. If it can't, specimen can be kept in -20 ℃ to preserve, Avoid repeated freeze-thaw cycles.
7. Can't detect the sample which contain NaN<sub>3</sub>, because NaN<sub>3</sub> inhibits HRP active.

### Assay procedure

1. Add standard: Set Standard wells, testing sample wells. Add standard 50μl to standard well.
- 2.add sample: Set blank wells separately (blank comparison wells don't add sample and HRP-Conjugate reagent, other each step operation is same). testing sample well. add Sample dilution 40μl to testing sample well, then add testing sample 10μl (sample final dilution is 5-fold), add sample to wells , don't touch the well wall as far as possible, and Gently mix.
- 3.add enzyme: Add HRP-Conjugate reagent 100μl to each well, except blank well.
- 4.Incubate: After closing plate with Closure plate membrane ,incubate for 60 min at 37℃.
- 5.Configure liquid: 20-fold wash solution diluted 20-fold with distilled water

and reserve.

6.washing: Uncover Closure plate membrane, discard Liquid, dry by swing, add washing buffer to every well, still for 30s then drain, repeat 5 times, dry by pat.

7.color : Add Chromogen Solution A 50ul and Chromogen Solution B to each well, evade the light preservation for 15 min at 37℃

8.Stop the reaction : Add Stop Solution 50ul to each well, Stop the reaction(the blue color change to yellow color).

9.assay : take blank well as zero , Read absorbance at 450nm after Adding Stop Solution and within 15min.

### Calculate

Take the standard density as the horizontal, the OD value for the vertical, draw the standard curve on graph paper, Find out the corresponding density according to the sample OD value by the Sample curve, multiplied by the dilution multiple, or calculate the straight line regression equation of the standard curve with the standard density and the OD value, with the sample OD value in the equation, calculate the sample density,

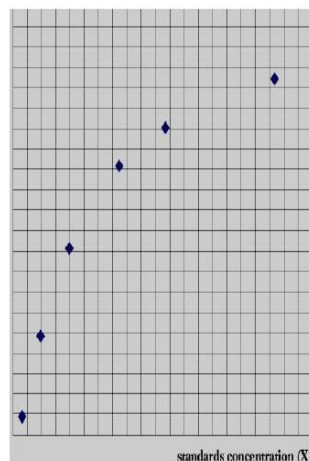

This chart is for reference only

### Assay range

0.25 ng/L - 8 ng/L

### Sensitivity

The minimum detectable dose is typically less than 0.1 ng/L

### Storage and validity

1. Storage : 2-8℃.
2. validity : six months.

## Plant Betaine

**FOR RESEARCH USE ONLY**

### Drug Names

Generic Name : **Plant Betaine (Betaine) ELISA Kit.**

### Purpose

This kit allows for the determination of Betaine concentrations in Plant tissue homogenates and other biological fluids.

### Principle of the assay

The kit assay Plant Betaine level in the sample, use Purified Plant Betaine antibody to coat microtiter plate wells, make solid-phase antibody, then add Betaine to the wells, Combined antibody which With HRP labeled, become antibody-antigen-enzyme-antibody complex, after washing Completely, Add TMB substrate solution, TMB substrate becomes blue color At HRP enzyme-catalyzed, reaction is terminated by the addition of a sulphuric acid solution and the color change is measured spectrophotometrically at a wavelength of 450 nm. The concentration of Betaine in the samples is then determined by comparing the O.D. of the samples to the standard curve.

## Materials provided with the kit

| Materials provided with the kit | 48determination<br>s | 96 determinations | Stora<br>ge |
|---------------------------------|----------------------|-------------------|-------------|
| User manual                     | 1                    | 1                 |             |
| Closure plate membrane          | 2                    | 2                 |             |
| Sealed bags                     | 1                    | 1                 |             |
| Microelisa stripplate           | 1                    | 1                 | 2-8℃        |
| Standard                        | 0.3ml×6 bottle       | 0.3ml×6 bottle    | 2-8℃        |
| HRP-Conjugate reagent           | 5ml×1 bottle         | 10ml×1 bottle     | 2-8℃        |
| Sample diluent                  | 3ml×1 bottle         | 6ml×1 bottle      | 2-8℃        |
| Chromogen Solution A            | 3ml×1 bottle         | 6ml×1 bottle      | 2-8℃        |
| Chromogen Solution B            | 3ml×1 bottle         | 6ml×1 bottle      | 2-8℃        |
| Stop Solution                   | 3ml×1 bottle         | 6ml×1 bottle      | 2-8℃        |
| 20× Wash solution               | 15ml×1 bottle        | 25ml×1 bottle     | 2-8℃        |

**Note:** Standard concentration was followed by:  
400、200、100、50、25、0 ng/mL.

## Specimen requirements

1. **serum**- coagulation at room temperature 10-20 mins , centrifugation 20-min at the speed of 2000-3000 r.p.m. remove supernatant, If precipitation appeared, Centrifugal again.
2. **plasma**-use suited EDTA or citrate plasma as an anticoagulant,mix 10-20 mins ,centrifugation 20-min at the speed of 2000-3000 r.p.m. remove supernatant, If precipitation appeared, Centrifugal again.
3. **Urine**-collect sue a sterile container, centrifugation 20-min at the speed of 2000-3000 r.p.m. remove supernatant, If precipitation appeared, Centrifugal again. The Operation of Hydrothorax and cerebrospinal fluid Reference to it.
4. **cell culture supernatant**-detect secretory components, collect sue a sterile container, centrifugation 20-min at the speed of 2000-3000 r.p.m. remove supernatant,detect the composition of cells, Dilut cell suspension



- with PBS (PH7.2-7.4) , Cell concentration reached 1 million / ml, repeated freeze-thaw cycles, damage cells and release of intracellular components, centrifugation 20-min at the speed of 2000-3000 r.p.m. remove supernatant, If precipitation appeared, Centrifugal again.
5. **Tissue samples-** After cutting samples, check the weight,add PBS ( PH7.2-7.4 ) , Rapidly frozen with liquid nitrogen, maintain samples at 2-8℃ after melting,add PBS (PH7.4) , Homogenized by hand or Grinders, centrifugation 20-min at the speed of 2000-3000 r.p.m. remove supernatant.
6. extract as soon as possible after Specimen collection,and according to the relevant literature, and should be experiment as soon as possible after the extraction. If it can't, specimen can be kept in -20 ℃ to preserve, Avoid repeated freeze-thaw cycles.
7. Can't detect the sample which contain NaN<sub>3</sub>, because NaN<sub>3</sub> inhibits HRP active.

### Assay procedure

1. Add standard: Set Standard wells, testing sample wells. Add standard 50μl to standard well.
- 2.add sample: Set blank wells separately (blank comparison wells don't add sample and HRP-Conjugate reagent, other each step operation is same). testing sample well. add Sample dilution 40μl to testing sample well, then add testing sample 10μl (sample final dilution is 5-fold), add sample to wells , don't touch the well wall as far as possible, and Gently mix.
- 3.add enzyme: Add HRP-Conjugate reagent 100μl to each well, except blank well.
- 4.Incubate: After closing plate with Closure plate membrane ,incubate for 60 min at 37℃.
- 5.Configure liquid: 20-fold wash solution diluted 20-fold with distilled water

and reserve.

6.washing: Uncover Closure plate membrane, discard Liquid, dry by swing, add washing buffer to every well, still for 30s then drain, repeat 5 times, dry by pat.

7.color : Add Chromogen Solution A 50ul and Chromogen Solution B to each well, evade the light preservation for 15 min at 37℃

8.Stop the reaction : Add Stop Solution 50μl to each well, Stop the reaction(the blue color change to yellow color).

9.assay : take blank well as zero , Read absorbance at 450nm after Adding Stop Solution and within 15min.

### Calculate

Take the standard density as the horizontal, the OD value for the vertical, draw the standard curve on graph paper, Find out the corresponding density according to the sample OD value by the Sample curve, multiplied by the dilution multiple, or calculate the straight line regression equation of the standard curve with the standard density and the OD value, with the sample OD value in the equation, calculate the sample density,

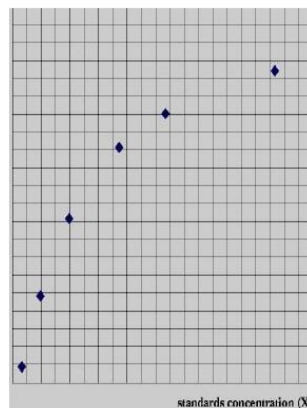

This chart is for reference only

### Assay range

12.5 ng/mL - 400 ng/mL

### Sensitivity

The minimum detectable dose is typically less than 1.0 ng/mL

### Storage and validity

1. Storage : 2-8℃.
2. validity : six months.
